# Supplementary material
Source: publisher site journal article supplement (https://www.dovepress.com/article/supplementary_file/612277/612277%20Revised%20Supplementary%20Materials.docx)

**Supplementary Table 1. Comparison of baseline characteristics among the study groups**

| Variable | Comparison | Test | Raw P value | Significant after Bonferroni (P < 0.0083) |
| --- | --- | --- | --- | --- |
| Stage | A vs B | χ² | <0.001 | Yes |
|  | A vs C | χ² | <0.001 | Yes |
|  | A vs D | χ² | <0.001 | Yes |
|  | B vs C | χ² | <0.001 | Yes |
|  | B vs D | χ² | 0.041 | No |
|  | C vs D | χ² | <0.001 | Yes |
| Depth of stromal invasion | A vs B | χ² | <0.001 | Yes |
|  | A vs C | χ² | <0.001 | Yes |
|  | A vs D | χ² | <0.001 | Yes |
|  | B vs C | χ² | <0.001 | Yes |
|  | B vs D | χ² | <0.001 | Yes |
|  | C vs D | χ² | <0.001 | Yes |
| Parametrial invasion | A vs B | Fisher | 1 | No |
|  | A vs C | Fisher | 0.781 | No |
|  | A vs D | Fisher | 0.622 | No |
|  | B vs C | Fisher | 1 | No |
|  | B vs D | Fisher | 1 | No |
|  | C vs D | Fisher | 0.593 | No |
| LVSI | A vs B | χ² | 0.74 | No |
|  | A vs C | χ² | 0.003 | Yes |
|  | A vs D | χ² | 0.019 | No |
|  | B vs C | χ² | 0.012 | No |
|  | B vs D | χ² | 0.86 | No |
|  | C vs D | χ² | 0.041 | No |
| NACT | A vs B | χ² | 0.001 | Yes |
|  | A vs C | χ² | 0.58 | No |
|  | A vs D | χ² | <0.001 | Yes |
|  | B vs C | χ² | <0.001 | Yes |
|  | B vs D | χ² | 0.29 | No |
|  | C vs D | χ² | <0.001 | Yes |
| Tumor differentiation | A vs B | χ² | <0.001 | Yes |
|  | A vs C | χ² | <0.001 | Yes |
|  | A vs D | χ² | <0.001 | Yes |
|  | B vs C | χ² | <0.001 | Yes |
|  | B vs D | χ² | <0.001 | Yes |
|  | C vs D | χ² | <0.001 | Yes |
| Lymph node metastasis | A vs B | Fisher | 0.002 | Yes |
|  | A vs C | Fisher | 0.032 | No |
|  | A vs D | Fisher | 0.041 | No |
|  | B vs C | Fisher | 0.71 | No |
|  | B vs D | Fisher | 1 | No |
|  | C vs D | Fisher | 0.89 | No |

**Supplementary Figure 1. Covariate balance before and after IPTW adjustment across the four treatment groups**


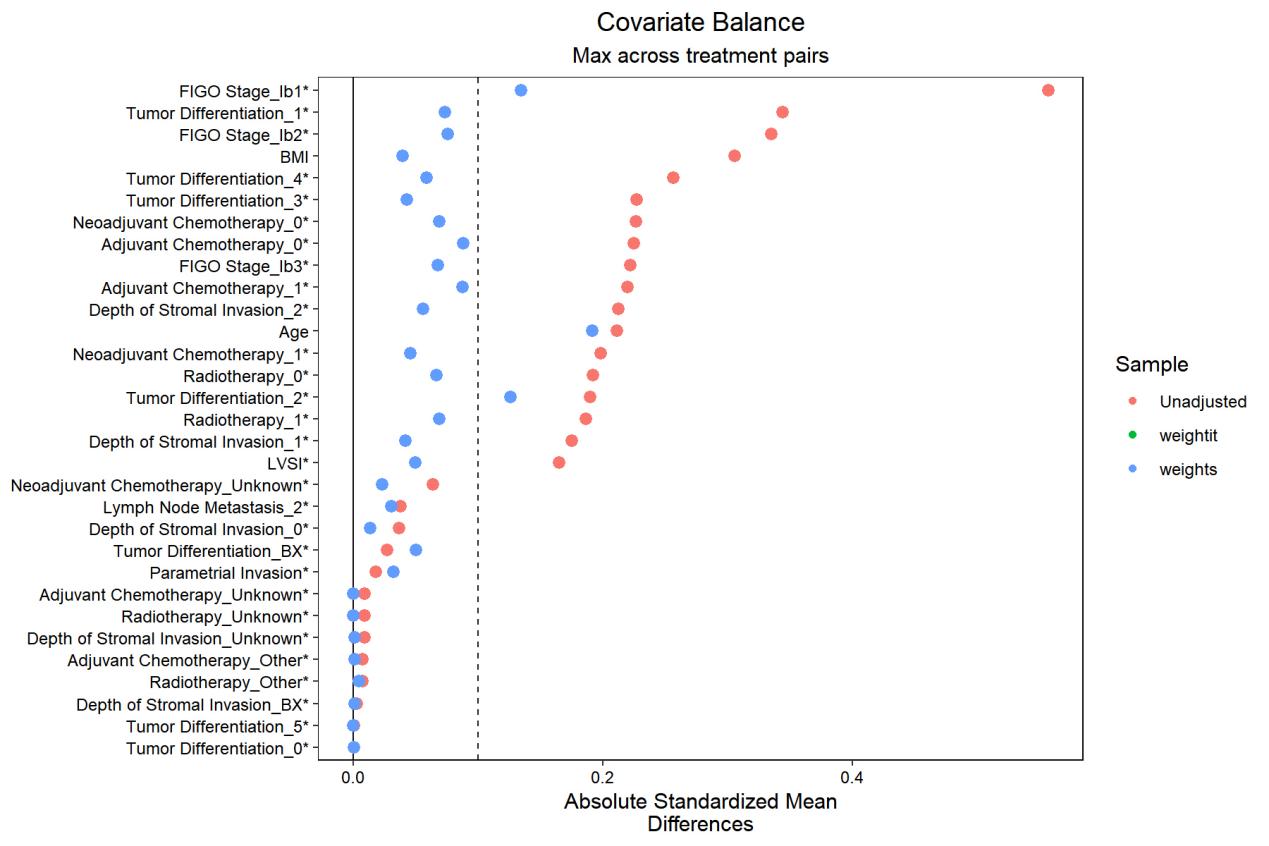

Supplement: Supplementary file 1 [file 612277%20Revised%20Supplementary%20Materials.docx]
